# Supplementary material
Source: ML conference proceedings conference paper supplement (https://openreview.net/forum?id=zlwBI2gQL3K)
Supplement: supplementary_material [file attachment]

## APPENDIX

### Anonymous authors

Paper under double-blind review

In this appendix, we first give a summary of all notations used in this paper. Then we give an overview of the proposed **HiRe** framework. We also provide the detailed results of ablation study and hyper-parameter sensitivity test on Nell-One.

### A NOTATIONS

The notations used in this paper are summarized in Table 1.

Table 1: Notations used in this paper.

| Symbol                                   | Description                                                          |
|------------------------------------------|----------------------------------------------------------------------|
| $\mathcal{G}$                            | knowledge graph                                                      |
| $\mathcal{E}, \mathcal{R}, \mathcal{TP}$ | entity, relation and triplet sets of a knowledge graph               |
| $h, t$                                   | head entity, tail entity                                             |
| $r$                                      | relation                                                             |
| $(h, r, t)$                              | factual triplet                                                      |
| $\mathbf{h}, \mathbf{r}, \mathbf{t}$     | embeddings of $h, r$ and $t$                                         |
| $\mathcal{T}_r$                          | few-shot task corresponding to relation $r$                          |
| $\mathcal{S}_r$                          | reference set corresponding to relation $r$                          |
| $\mathcal{Q}_r$                          | query set corresponding to relation $r$                              |
| $\mathbb{C}_{(\tilde{h}_j, r)}$          | candidate set for the potential tail entity of $(\tilde{h}_j, r, ?)$ |
| $\mathcal{N}_e$                          | neighborhood of entity $e$                                           |
| $\mathcal{C}_{(h, r, t)}$                | context of triplet $(h, r, t)$                                       |

### B OVERVIEW OF THE PROPOSED HiRE FRAMEWORK

Figure 1 shows an overview of our proposed hierarchical relational learning (HiRe) framework.

### C ABLATION STUDY ON NELL-ONE

Table 2 illustrates the contribution of each component to the overall performance on Nell-One. As discussed in Section 5.5, each component in our proposed HiRe framework plays an important role in few-shot KG completion. The removal of any component leads to performance drops in terms of all evaluation metrics.

Table 2: Ablation study of HiRe under 3-shot and 5-shot settings on Nell-One.

| Ablation on ↓ | Components |     |         | 3-shot |         |        |        | 5-shot |         |        |        |
|---------------|------------|-----|---------|--------|---------|--------|--------|--------|---------|--------|--------|
|               | MTransD    | MRL | Context | MRR    | Hits@10 | Hits@5 | Hits@1 | MRR    | Hits@10 | Hits@5 | Hits@1 |
| HiRe          | ✓          | ✓   | ✓       | 0.300  | 0.499   | 0.425  | 0.199  | 0.306  | 0.520   | 0.439  | 0.207  |
| w/o MTransD   | ✗          | ✓   | ✓       | 0.295  | 0.491   | 0.420  | 0.193  | 0.302  | 0.515   | 0.428  | 0.202  |
| w/o MRL-AVG   | ✓          | ✗   | ✓       | 0.282  | 0.467   | 0.382  | 0.185  | 0.286  | 0.466   | 0.394  | 0.188  |
| w/o MRL-LSTM  | ✓          | ✗   | ✓       | 0.280  | 0.490   | 0.410  | 0.168  | 0.285  | 0.459   | 0.390  | 0.185  |
| w/o Context   | ✓          | ✓   | ✗       | 0.290  | 0.482   | 0.401  | 0.186  | 0.295  | 0.489   | 0.418  | 0.197  |

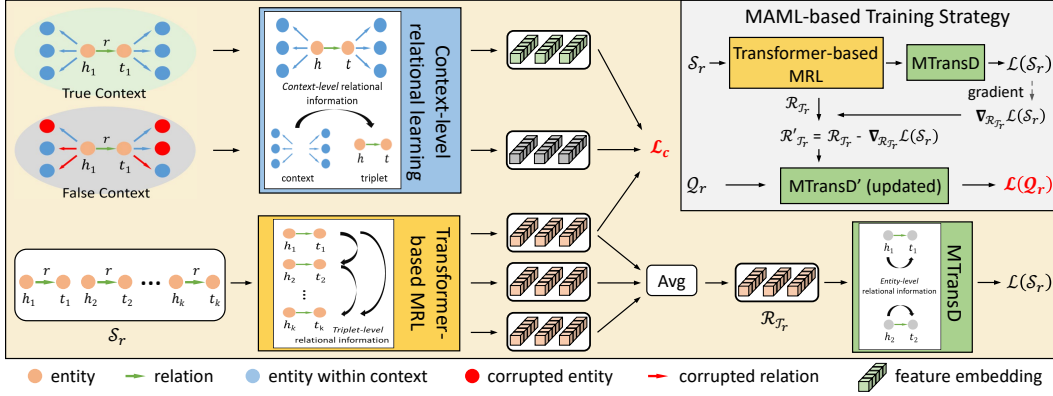

Figure 1: An overview of **HiRe** framework composed of three key components. (1) Contrastive learning based context-level relational learning; (2) Transformer-based triplet-level relational learning; (3) Meta representation based entity-level relational learning. Given a target relation  $r$  and its corresponding reference set  $\mathcal{S}_r$  and query set  $\mathcal{Q}_r$ , we employ a contrastive loss  $\mathcal{L}_c$  between the true/false contexts and the anchor triplet (take  $(h_1, r, t_1)$  as an example) via our proposed contrastive learning based context-level relational learning method. The meta representation of the target relation  $\mathcal{R}_{\mathcal{T}_r}$  is learned by our Transformer-based meta relation learner (MRL), capturing pairwise triplet-level relational information. Lastly, MTransD refines the learned meta relation representation at the entity level constrained by  $\mathcal{L}(\mathcal{S}_r)$ . The whole learning framework is optimized by a MAML-based training strategy.

## D HYPER-PARAMETER SENSITIVITY STUDY ON NELL-ONE

The sensitivity test on hyper-parameter  $N$  and  $\lambda$  is shown in Figure 2 and Figure 3. As illustrated in Figure 2, as the number of false contexts increases, the performance of HiRe drops slightly because its model training converges to a sub-optimal state. In addition, the best  $\lambda$  value is also 0.05 on Nell-One. The overall results are consistent with the conclusion we draw from the results on Wiki-One in Section 5.6.

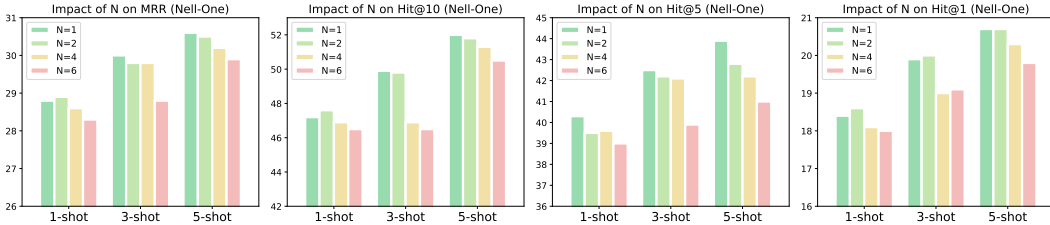

Figure 2: Hyper-parameter sensitivity study of the number of false contexts on Nell-One.

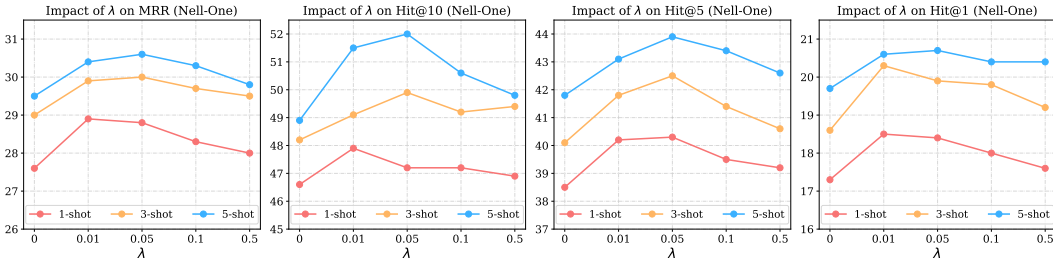

Figure 3: The impact of different  $\lambda$  in Eq. 21 on Nell-One.  $\lambda = 0$  means that we remove the contrastive learning based context-level relational learning.
